# Supplementary material for: Association between statin therapy and the risk of stroke in patients with moyamoya disease: a nationwide cohort study
Source: HighWire-hosted journal article supplement (doi:10.1136/svn-2022-001985), 2022-12-22
Supplement: svn-2022-001985supp001_data_supplement.pdf [file svn-2022-001985supp001_data_supplement.pdf]

## SUPPLEMENTAL PUBLICATION MATERIAL

## Supplementary figure

**Fig. S1.** The proportion of patients who received statins before and after diagnosis with moyamoya disease (MMD)

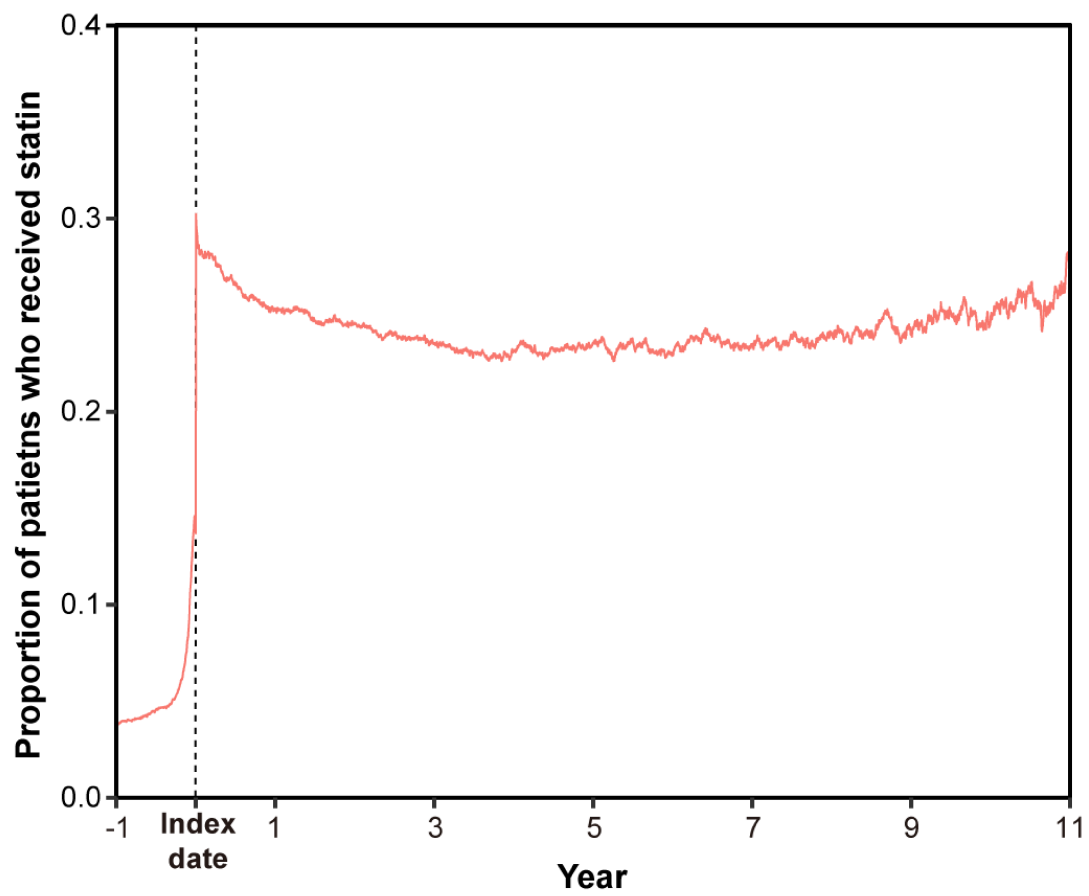

Fig. S2. Estimated stroke-free survival curve according to the use of statins

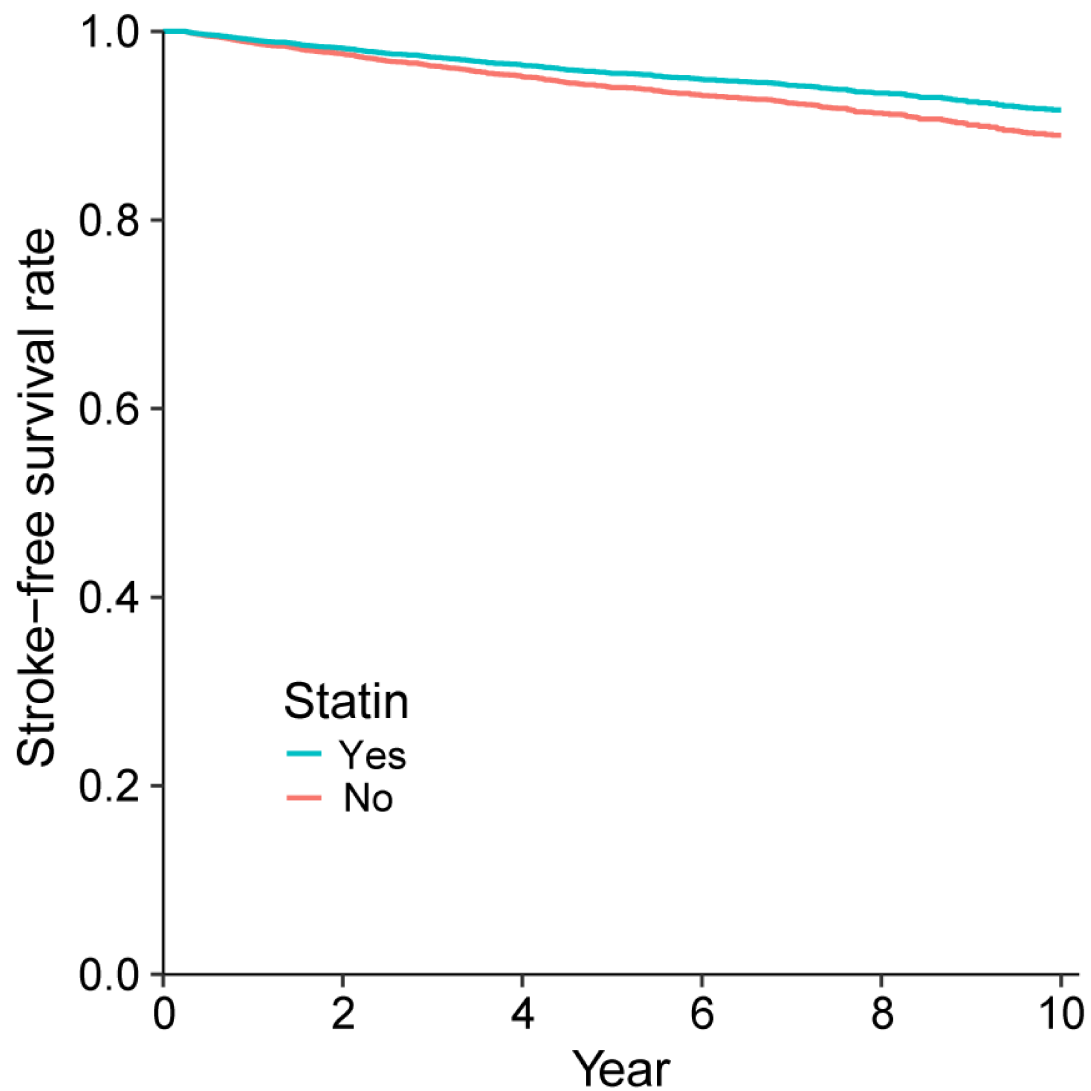

The X-axis indicates the time (year) from the diagnosis of moyamoya disease (index date). The plot indicates estimated stroke-free survival curves according to the use of statins based on the multivariate time-dependent Cox regression model (Table 2).

**Supplementary tables****Supplementary table S1.** Baseline characteristics of the included and excluded patients in the study

| Variable                  | Total<br>(N=23,310) | Included<br>(N=13,373) | Excluded<br>(N=9,937) | P value |
|---------------------------|---------------------|------------------------|-----------------------|---------|
| Sex, male                 | 8,210 (35.2)        | 4,657 (34.8)           | 3,553 (35.8)          | 0.141   |
| Age, year                 | 40.1 ±18.7          | 38.7 ± 18.2            | 41.9 ± 19.1           | <0.001  |
| Concurrent stroke         | 7,472 (32.1)        | 5,454 (40.8)           | 2,018 (20.3)          | <0.001  |
| Revascularization surgery | 5,199 (22.3)        | 3,877 (29.0)           | 1322 (13.3)           | <0.001  |
| <b>Comorbidity</b>        |                     |                        |                       |         |
| Hypertension              | 9,375 (40.2)        | 4,800 (35.9)           | 4,575 (46.0)          | <0.001  |
| Diabetes mellitus         | 2,616 (11.2)        | 1,377 (10.3)           | 1,239 (12.5)          | <0.001  |
| Atrial fibrillation       | 677 (2.9)           | 340 (2.5)              | 337 (3.4)             | <0.001  |
| Renal disease             | 1,005 (4.3)         | 439 (3.3)              | 566 (5.7)             | <0.001  |
| Malignancy                | 662 (2.8)           | 372 (2.8)              | 290 (2.9)             | 0.535   |

The data are represented as numbers (%) or mean ± standard deviation. P value is derived from chi-square test for categorical variables and independent t-test for continuous variable.

**Supplementary table S2.** Type and daily dose of statin in the patients at 90 days after the index date

| Type of statin | Dose per day, mg |     |     |    |     |      |     |     |    |    |
|----------------|------------------|-----|-----|----|-----|------|-----|-----|----|----|
|                | 1                | 2   | 2.5 | 4  | 5   | 10   | 20  | 40  | 60 | 80 |
| Atorvastatin   | 0                | 0   | 0   | 0  | 24  | 1036 | 661 | 285 | 53 | 0  |
| Fluvastatin    | 0                | 0   | 0   | 0  | 0   | 0    | 0   | 2   | 0  | 17 |
| Lovastatin     | 0                | 0   | 0   | 0  | 0   | 0    | 1   | 0   | 1  | 0  |
| Pitavastatin   | 7                | 101 | 0   | 52 | 0   | 0    | 0   | 0   | 0  | 0  |
| Pravastatin    | 0                | 0   | 0   | 0  | 3   | 21   | 22  | 49  | 0  | 0  |
| Rosuvastatin   | 0                | 0   | 3   | 0  | 231 | 597  | 182 | 1   | 0  | 0  |
| Simvastatin    | 0                | 0   | 0   | 0  | 1   | 77   | 142 | 16  | 0  | 0  |

Data are number of patients taking the statin at 90 days from the diagnosis of moyamoya disease.

**Supplementary table S3.** Characteristics of the patients at 90 days after the index date

| Variable                  | Total<br>(n = 13,373) | No statin<br>(n=9,788) | Statin<br>(n=3,585) | P value |
|---------------------------|-----------------------|------------------------|---------------------|---------|
| Sex, male                 | 4,657 (34.8)          | 3,376 (34.5)           | 1,281 (35.7)        | 0.182   |
| Age, year                 | 38.7 ± 18.2           | 34.9 ± 18.7            | 49.0 ± 11.7         | <0.001  |
| Concurrent stroke         | 5,454 (40.8)          | 3,645 (37.2)           | 1,809 (50.5)        | <0.001  |
| Revascularization surgery | 3,877 (29.0)          | 3,272 (33.4)           | 605 (16.9)          |         |
| Comorbidity               |                       |                        |                     |         |
| Hypertension              | 4,800 (35.9)          | 2,773 (28.3)           | 2,027 (56.5)        | <0.001  |
| Diabetes mellitus         | 1,377 (10.3)          | 602 (6.2)              | 775 (21.6)          | <0.001  |
| Atrial fibrillation       | 340 (2.5)             | 208 (2.1)              | 132 (3.7)           | <0.001  |
| Renal disease             | 439 (3.3)             | 248 (2.5)              | 191 (5.3)           | <0.001  |
| Malignancy                | 372 (2.8)             | 251 (2.6)              | 121 (3.4)           | 0.535   |

The data are represented as numbers (%) or mean ± standard deviation. P value is derived from chi-square test for categorical variables and independent t-test for continuous variable.

**Supplementary table S4.** Risk factors for the primary outcome regarding the statin intensity in MMD patients

| Variable                       | Adjusted HR (95% CI)* | P value |
|--------------------------------|-----------------------|---------|
| Sex, male                      | 0.89 (0.75–1.06)      | 0.198   |
| Age, years                     | 1.02 (1.02–1.03)      | <0.001  |
| Concurrent stroke <sup>†</sup> | 1.28 (1.08–1.50)      | 0.004   |
| Revascularization surgery      | 0.67 (0.54–0.85)      | <0.001  |
| Comorbidities                  |                       |         |
| Hypertension                   | 0.85 (0.71–1.02)      | 0.086   |
| Diabetes mellitus              | 1.03 (0.80–1.34)      | 0.803   |
| Atrial fibrillation            | 0.79 (0.44–1.40)      | 0.415   |
| Renal disease                  | 1.31 (0.90–1.92)      | 0.163   |
| Malignancy                     | 1.25 (0.82–1.93)      | 0.302   |
| Medication                     |                       |         |
| Antiplatelet                   |                       |         |
| No antiplatelet                | 1 (ref)               |         |
| Single antiplatelet            | 1.00 (0.83–1.19)      | 0.974   |
| Dual antiplatelet              | 1.24 (0.90–1.69)      | 0.184   |
| Statin intensity <sup>‡</sup>  |                       |         |
| No statin                      | 1 (ref)               |         |
| Low                            | 0.63 (0.28–1.41)      | 0.263   |
| High                           | 0.75 (0.61–0.92)      | 0.006   |

Data were obtained from the multivariable time-dependent Cox proportional hazards regression model for the development of stroke.

MMD, moyamoya disease; HR, hazard ratio; CI, confidence interval

\*Adjusted for the covariates listed in this table.

<sup>†</sup>Stroke within 3 months before or after the diagnosis of moyamoya disease

<sup>‡</sup>'Low intensity statin' was determined according to the 2013 American Heart

Association/American College of Cardiology guidelines on the management of blood cholesterol.<sup>1</sup> Statins above the dosage of 'low intensity' was determined as 'high-intensity'.

## References

- 1 Stone NJ, Robinson JG, Lichtenstein AH, *et al.* 2013 ACC/AHA guideline on the treatment of blood cholesterol to reduce atherosclerotic cardiovascular risk in adults: a report of the American College of Cardiology/American Heart Association Task Force on Practice Guidelines. *Circulation* 2014;**129**:S1-45. doi:10.1161/01.cir.0000437738.63853.7a
